# Supplementary material for: Musical experience prior to traumatic exposure as a resilience factor: a conceptual analysis
Source: PubMed Central journal article supplement (PMC10436084; doi:10.3389/fpsyg.2023.1220489), 2023-07-27
Supplement: Table_1.pdf [file Table_1.pdf]

## Supplementary material

**Table 1. Structural and functional modifications associated with PTSD in relation to the structural and functional modifications induced by playing or listening to music.**

|                                        | Modifications in PTSD                                                                                             |                                                                        | Music-induced changes                                                                                                                                         |                                                                                                                                                                                                            |
|----------------------------------------|-------------------------------------------------------------------------------------------------------------------|------------------------------------------------------------------------|---------------------------------------------------------------------------------------------------------------------------------------------------------------|------------------------------------------------------------------------------------------------------------------------------------------------------------------------------------------------------------|
|                                        | Structural                                                                                                        | Functional                                                             | Structural                                                                                                                                                    | Functional                                                                                                                                                                                                 |
| <b>Prefrontal cortex</b>               | Atrophy (Harnett et al., 2020; Shin, 2006)                                                                        | Hypoactivation (Harnett et al., 2020; Shin, 2006)                      | Gray matter volume of right superior and middle frontal cortex increases <b>with duration of musical practice</b> (Groussard, 2014)                           | Activation of the prefrontal cortex <b>when listening to happy or favorite piece</b> (Moore, 2013)<br>Supplementary activations in the medial frontal gyrus induced by musical expertise (Groussard, 2010) |
| <b>Hippocampus</b>                     | Atrophy (Geuze et al., 2005; Logue et al., 2018; Postel et al., 2021; Woon & Hedges, 2008; Yehuda & LeDoux, 2007) | No clear pattern (Geuze et al., 2005; Yehuda & LeDoux, 2007)           | Gray matter volume of the left hippocampus increases <b>with duration of musical practice</b> (Groussard, 2014)                                               | <b>Supplementary activations induced by musical expertise</b> (Groussard, 2010)                                                                                                                            |
| <b>Anterior cingulate cortex</b>       |                                                                                                                   | Hypoactivation (Dossi et al., 2020; Fitzgerald et al., 2018)           |                                                                                                                                                               | Activation of the left ACC <b>when listening to favorable piece</b> and activation of the right ACC <b>during music improvisation task</b> (Blood & Zatorre, 2001; Moore, 2013)                            |
| <b>Amygdala</b>                        |                                                                                                                   | Hyperactivation (Harnett et al., 2020; Hayes et al., 2012; Shin, 2006) |                                                                                                                                                               | <b>Decreased</b> amygdala activation <b>when listening to music considered pleasant or joyful and during musical improvisation</b> (Blood & Zatorre, 2001; Moore, 2013)                                    |
| <b>Fronto-hippocampal connectivity</b> | Impaired connectivity (Leone et al., 2022; Mary et al., 2020)                                                     |                                                                        | <b>Better top-down modulation owing to musical expertise</b> (Gagnepain, 2017a)                                                                               |                                                                                                                                                                                                            |
| <b>Fronto-amygdala connectivity</b>    | Impaired connectivity (Andrewes, 2019)                                                                            |                                                                        | Elicited by the emotional regulation provided by music. <b>Better medial prefrontal-amygdala connectivity during musical improvisation</b> (Liu et al., 2012) |                                                                                                                                                                                                            |
